# Supplementary material for: Grain size of fluvial gravel bars from close-range UAV imagery – uncertainty in segmentation-based data
Source: Copernicus journal article supplement (doi:10.5194/esurf-10-953-2022), 2022-10-07
Supplement: Supplementary file 1 [file esurf-10-953-2022-supplement.pdf]

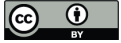

*Supplement of*

## **Grain size of fluvial gravel bars from close-range UAV imagery – uncertainty in segmentation-based data**

**David Mair et al.**

*Correspondence to:* David Mair ([david.mair@geo.unibe.ch](mailto:david.mair@geo.unibe.ch))

The copyright of individual parts of the supplement might differ from the article licence.

| <i>Survey</i> | <i>Field ID</i> | <i>GCP ID</i> | <i>Easting</i><br>(°) | <i>Northing</i><br>(°) | <i>Elevation</i><br>(m a.s.l.) | <i>3D Accuracy</i><br>(m) |
|---------------|-----------------|---------------|-----------------------|------------------------|--------------------------------|---------------------------|
| K1            | 5               | 1             | 7.633978542           | 46.70262324            | 574.798                        | 0.011                     |
|               | 11              | 2             | 7.633927207           | 46.7025746             | 574.987                        | 0.013                     |
|               | 12              | 3             | 7.633982564           | 46.70254684            | 574.98                         | 0.01                      |
|               | 16              | 4             | 7.634053643           | 46.70254345            | 574.518                        | 0.011                     |
|               | 18              | 5             | 7.634035788           | 46.70250219            | 574.655                        | 0.01                      |
|               | 21              | 6             | 7.633935624           | 46.70250925            | 575.014                        | 0.01                      |
|               | 24              | 7             | 7.633929205           | 46.70254181            | 575.001                        | 0.01                      |
|               | 28              | 8             | 7.634050443           | 46.70258424            | 574.545                        | 0.011                     |
|               | 35              | 9             | 7.634009968           | 46.70250697            | 574.71                         | 0.012                     |
|               | 38              | 10            | 7.633972221           | 46.70244858            | 574.809                        | 0.01                      |
|               | 39              | 11            | 7.633921004           | 46.70245605            | 574.919                        | 0.009                     |
|               | 43              | 12            | 7.633994576           | 46.70242267            | 574.732                        | 0.01                      |
|               | 45              | 13            | 7.633940954           | 46.70241054            | 574.882                        | 0.009                     |
|               | 50              | 14            | 7.633898189           | 46.70239369            | 574.969                        | 0.009                     |
|               | 53              | 15            | 7.633965197           | 46.70236111            | 574.694                        | 0.009                     |
|               | 55              | 16            | 7.633912057           | 46.70231872            | 574.802                        | 0.011                     |
| L2            | 50              | 50            | 2634877.559           | 1165050.246            | 642.943                        | 0.012                     |
|               | 51              | 51            | 2634878.472           | 1165054.814            | 642.835                        | 0.014                     |
|               | 55              | 55            | 2634873.446           | 1165053.794            | 643.101                        | 0.013                     |
|               | 57              | 57            | 2634872.512           | 1165058.06             | 643.026                        | 0.013                     |
|               | 59              | 59            | 2634875.441           | 1165057.422            | 643.049                        | 0.013                     |
|               | 61              | 61            | 2634877.773           | 1165060.181            | 642.867                        | 0.012                     |
|               | 64              | 64            | 2634875.285           | 1165061.337            | 643.033                        | 0.012                     |
|               | 66              | 66            | 2634871.587           | 1165063.16             | 643.074                        | 0.013                     |
|               | 68              | 68            | 2634875.217           | 1165064.563            | 643.019                        | 0.011                     |
|               | 70              | 70            | 2634878.698           | 1165064.415            | 642.822                        | 0.011                     |
|               | 74              | 74            | 2634877.42            | 1165068.932            | 642.88                         | 0.013                     |
|               | 76              | 76            | 2634876.905           | 1165067.568            | 642.835                        | 0.012                     |
| 78            | 78              | 2634872.733   | 1165067.317           | 643.063                | 0.013                          |                           |
| S9            | GPS0039         | 1             | 2647708.532           | 1203191.269            | 723.871                        | 0.02                      |
|               | GPS0040         | 2             | 2647709.096           | 1203185.589            | 723.873                        | 0.02                      |
|               | GPS0041         | 3             | 2647711.491           | 1203173.93             | 724.102                        | 0.05                      |
|               | GPS0043         | 4             | 2647723.412           | 1203159.519            | 724.628                        | 0.04                      |
|               | GPS0045         | 5             | 2647731.832           | 1203151.353            | 724.639                        | 0.02                      |
|               | GPS0046         | 6             | 2647744.494           | 1203149.023            | 724.874                        | 0.025                     |
|               | GPS0047         | 7             | 2647745.243           | 1203158.811            | 724.88                         | 0.03                      |
|               | GPS0049         | 8             | 2647743.922           | 1203169.4              | 724.511                        | 0.06                      |
|               | GPS0051         | 9             | 2647738.787           | 1203174.019            | 724.636                        | 0.03                      |
|               | GPS0052         | 10            | 2647731.61            | 1203182.099            | 724.258                        | 0.02                      |
|               | GPS0053         | 11            | 2647725.964           | 1203175.669            | 724.35                         | 0.025                     |
|               | GPS0054         | 12            | 2647722.325           | 1203173.462            | 724.238                        | 0.025                     |
|               | GPS0055         | 13            | 2647720.225           | 1203179.026            | 724.1                          | 0.03                      |
|               | GPS0056         | 14            | 2647730.354           | 1203170.238            | 724.603                        | 0.025                     |

**Table S1:** Ground control points measured with a differential RTK GNSS.

| Model name | Control point uncertainty |      |      |        |        |       | Check point uncertainty |        |        |          |           |          | Reprojection error (pix) | Image error (pix) |
|------------|---------------------------|------|------|--------|--------|-------|-------------------------|--------|--------|----------|-----------|----------|--------------------------|-------------------|
|            | (mm)                      |      |      |        |        |       | (mm)                    |        |        |          |           |          |                          |                   |
|            | X,Y RMSE                  | mean | Std  | Z RMSE | mean   | Std   | X,Y RMSE                | mean   | Std    | Z RMSE   | mean      | Std      |                          |                   |
| K1_1_C1    | 13.0                      | -0.2 | 9.6  | 45.9   | 2.6    | 49.0  | 12.7                    | -1.8   | 9.1    | 54.1     | -4.9      | 57.6     | 0.9                      | 1.8               |
| K1_1_C2    | 13.3                      | -0.2 | 9.5  | 46.1   | 2.7    | 49.2  | 14.7                    | -2.3   | 10.5   | 66.2     | -10.7     | 69.9     | 0.7                      | 1.2               |
| K1_1_C3    | -                         | -    | -    | -      | -      | -     | 1034.7                  | -49.9  | 1182.6 | 967.1    | -5024.7   | 246.8    | 0.9                      | 1.9               |
| K1_1_C4    | -                         | -    | -    | -      | -      | -     | 2129.2                  | -146.2 | 1522.4 | 4274.8   | -4236.2   | 591.9    | 0.7                      | 1.1               |
| K1_2_C1    | 13.1                      | -0.2 | 9.2  | 95.3   | 2.6    | 101.8 | 9.4                     | 0.0    | 6.9    | 106.0    | 27.8      | 109.3    | 1.0                      | 2.0               |
| K1_2_C2    | 13.6                      | -0.2 | 11.4 | 119.5  | 2.8    | 127.7 | 17.7                    | -2.7   | 12.6   | 186.0    | -52.4     | 190.8    | 0.9                      | 1.5               |
| K1_2_C3    | -                         | -    | -    | -      | -      | -     | 1719.4                  | -51.3  | 1234.2 | 5289.0   | -5280.6   | 307.4    | 0.9                      | 2.1               |
| K1_2_C4    | -                         | -    | -    | -      | -      | -     | 2389.0                  | 24.0   | 1716.1 | 5592.3   | -5559.7   | 623.1    | 1.1                      | 1.4               |
| L2_1_C1    | 16.0                      | -2.2 | 17.7 | 13.3   | 0.1    | 24.3  | 24.1                    | 0.1    | 11.7   | 22.2     | -2.0      | 14.2     | 1.2                      | 5.4               |
| L2_1_C2    | 47.5                      | -1.2 | 34.9 | 41.5   | 1.4    | 44.8  | 40.6                    | 3.0    | 29.8   | 50.8     | -1.7      | 55.6     | 1.3                      | 4.3               |
| L2_1_C3    | -                         | -    | -    | -      | -      | -     | 1853.9                  | 1163.4 | 730.4  | 66554.0  | -66913.7  | 150.6    | 1.4                      | 4.5               |
| L2_1_C4    | -                         | -    | -    | -      | -      | -     | 2033.1                  | 929.2  | 1118.7 | 68718.6  | -68718.5  | 145.7    | 1.3                      | 3.7               |
| L2_2_C1    | 16.4                      | 0.4  | 12.0 | 18.5   | -1.2   | 20.0  | 20.8                    | 0.1    | 15.2   | 18.0     | -4.4      | 19.2     | 1.3                      | 3.7               |
| L2_2_C2*   | 16.2                      | 0.0  | 10.9 | 11.2   | -1.6   | 11.1  | 24.9                    | -6.7   | 17.2   | 82.0     | -54.4     | 68.5     | 1.4                      | 6.2               |
| L2_2_C3    | -                         | -    | -    | -      | -      | -     | 1853.9                  | 1075.5 | 764.4  | 66554.0  | -66552.3  | 497.6    | 1.4                      | 3.5               |
| L2_2_C4*   | -                         | -    | -    | -      | -      | -     | 2126.8                  | 1002.7 | 1117.9 | 66797.7  | -66710.4  | 293.9    | 1.4                      | 6.2               |
| S9_5_C1    | 43.9                      | 6.6  | 31.5 | 55.5   | -53.6  | 15.8  | 63.6                    | 8.8    | 45.8   | 38.6     | -27.6     | 29.1     | 0.7                      | 1.2               |
| S9_5_C2    | -                         | -    | -    | -      | -      | -     | 1555.3                  | 1082.6 | 196.8  | 2.0E+05  | -201007.3 | 208.7    | 0.8                      | 0.5               |
| S9_5_C3*   | 47.8                      | 9.8  | 33.5 | 147.0  | -2.2   | 158.8 | 57.2                    | 17.1   | 38.1   | 211.3    | -8.4      | 228.0835 | 0.6                      | 0.7               |
| S9_5_C4    | -                         | -    | -    | -      | -      | -     | 1700.2                  | 1147.0 | 366.6  | 201211.0 | -201211.3 | 275.3    | 0.4                      | 0.8               |
| S9_5_C5    | -                         | -    | -    | -      | -      | -     | 1556.2                  | 1083.3 | 196.9  | 201008.0 | -201007.8 | 205.3    | 0.6                      | 1.1               |
| S9_5_C6    | -                         | -    | -    | -      | -      | -     | 1699.3                  | 1146.3 | 367.0  | 201190.0 | -201190.0 | 267.4    | 0.4                      | 1.1               |
| S9_6_C1    | 45.5                      | 6.9  | 33.1 | 153.0  | -122.0 | 103.2 | 40.4                    | 11.7   | 27.4   | 143.1    | -137.1    | 45.7     | 1.3                      | 1.3               |
| S9_6_C2    | -                         | -    | -    | -      | -      | -     | 4565.1                  | 2834.1 | 1585.4 | 201498.0 | -201497.7 | 224.7    | 1.3                      | 1.3               |
| S9_6_C3*   | 30.7                      | -2.4 | 23.1 | 92.0   | -70.4  | 68.2  | 33.4                    | 6.3    | 24.3   | 213.7    | -46.4     | 240.8    | 0.6                      | 1.0               |
| S9_6_C4*   | -                         | -    | -    | -      | -      | -     | 4761.7                  | 3294.9 | 1233.5 | 200488.0 | -200426.0 | 185.8    | 0.6                      | 1.6               |
| S9_6_C5    | -                         | -    | -    | -      | -      | -     | 4566.2                  | 2834.9 | 1585.7 | 201506.0 | -201506.0 | 226.5    | 1.4                      | 1.2               |
| S9_6_C6*   | -                         | -    | -    | -      | -      | -     | 4917.0                  | 3058.9 | 1698.8 | 201496.0 | -201495.7 | 102.3    | 0.7                      | 1.0               |

*\*pre-calibrated camera lens model used*

**Table S2:** SfM model reference accuracy and image errors. RMSE = root mean square error, Std = standard deviation, pix = pixel.

| Model Name | Camera Pitch (°) |     |      |     | Tie Point Observation Distance (m) |      |       |      | Tie point number | After filtering | Avg. tie point multiplicity | M.K.P. size (pix) | Sparse point cloud precision (mm) |       |       |       |       |       |        |        |        |
|------------|------------------|-----|------|-----|------------------------------------|------|-------|------|------------------|-----------------|-----------------------------|-------------------|-----------------------------------|-------|-------|-------|-------|-------|--------|--------|--------|
|            | mean             | Std | mean | Std | mean                               | Std  | mean  | Std  |                  |                 |                             |                   | x                                 | X Std | y     | y Std | z     | z Std | max. x | max. y | max. z |
| K1_1_C1    | 0.0              | 0.1 | 19.9 | 0.2 | 5.73                               | 0.42 | -     | -    | 975,459          | 669,818         | 4.0                         | 4.0               | 3.1                               | 2.9   | 2.6   | 2.3   | 6.5   | 5.2   | 62.3   | 56.7   | 63.0   |
| K1_1_C2    | 0.0              | 0.0 | -    | -   | 4.92                               | 0.37 | -     | -    | 706,896          | 635,306         | 3.8                         | 4.1               | 2.3                               | 2.1   | 1.8   | 1.3   | 4.2   | 3.2   | 39.4   | 30.1   | 43.5   |
| K1_1_C3    | 0.0              | 0.0 | 19.9 | 0.2 | 5.64                               | 0.42 | -     | -    | 975,460          | 669,823         | 4.0                         | 4.2               | 176.6                             | 25.3  | 140.7 | 29.2  | 167.1 | 38.2  | 290.2  | 262.3  | 333.3  |
| K1_1_C4    | 0.0              | 0.0 | -    | -   | 4.86                               | 0.37 | -     | -    | 706,896          | 635,254         | 3.8                         | 4.1               | 173.5                             | 27.1  | 138.1 | 28.7  | 169.9 | 40.5  | 265.3  | 228.6  | 314.1  |
| K1_2_C1    | 0.0              | 0.1 | 19.9 | 0.2 | 5.81                               | 0.43 | -     | -    | 1,032,779        | 718,005         | 3.4                         | 3.3               | 4.5                               | 3.3   | 3.8   | 2.4   | 9.7   | 6.9   | 76.0   | 67.6   | 110.6  |
| K1_2_C2    | 0.0              | 0.1 | -    | -   | 5.95                               | 0.45 | -     | -    | 770,781          | 677,738         | 3.3                         | 3.2               | 4.3                               | 3.0   | 3.5   | 1.9   | 9.4   | 6.4   | 53.6   | 51.5   | 101.8  |
| K1_2_C3    | 0.0              | 0.1 | 19.9 | 0.2 | 5.79                               | 0.43 | -     | -    | 1,032,779        | 713,247         | 3.4                         | 3.3               | 298.5                             | 36.3  | 235.2 | 46.7  | 276.4 | 61.6  | 458.8  | 424.2  | 552.1  |
| K1_2_C4    | 0.0              | 0.1 | -    | -   | 6.46                               | 0.50 | -     | -    | 770,781          | 742,275         | 3.3                         | 3.6               | 473.0                             | 71.1  | 339.3 | 66.3  | 402.5 | 92.9  | 711.5  | 542.2  | 734.2  |
| L2_1_C1    | 0.1              | 0.1 | 20.1 | 0.0 | 4.68                               | 0.58 | -     | -    | 393,674          | 268,871         | 3.2                         | 3.8               | 5.6                               | 4.1   | 5.0   | 3.3   | 10.2  | 7.8   | 142.8  | 166.7  | 118.0  |
| L2_1_C2    | 0.1              | 0.1 | -    | -   | 5.59                               | 0.41 | -     | -    | 299,655          | 216,409         | 2.8                         | 3.8               | 19.0                              | 16.4  | 16.0  | 9.2   | 19.8  | 7.8   | 483.1  | 409.5  | 206.2  |
| L2_1_C3    | 0.1              | 0.1 | 20.1 | 0.0 | 4.76                               | 0.58 | -     | -    | 363,232          | 285,529         | 2.8                         | 3.2               | 996.2                             | 104.8 | 924.0 | 114.7 | 978.2 | 205.4 | 1685.9 | 1620.1 | 2063.1 |
| L2_1_C4    | 0.1              | 0.1 | -    | -   | 6.28                               | 0.46 | -     | -    | 299,655          | 186,239         | 2.8                         | 3.8               | 523.0                             | 103.8 | 522.9 | 103.8 | 972.0 | 107.6 | 876.7  | 876.7  | 1409.3 |
| L2_2_C1‡   | 0.0              | 0.1 | 20.1 | 0.0 | 4.72                               | 0.62 | -     | -    | 363,233          | 267,226         | 2.8                         | 2.9               | 5.0                               | 4.7   | 4.2   | 3.3   | 9.5   | 7.9   | 119.7  | 76.0   | 118.0  |
| L2_2_C2*   | 0.0              | 0.1 | -    | -   | 4.48                               | 0.38 | -     | -    | 257,798          | 206,015         | 2.6                         | 2.8               | 7.8                               | 3.7   | 7.0   | 2.5   | 12.9  | 8.4   | 63.2   | 40.8   | 113.7  |
| L2_2_C3‡   | 0.0              | 0.1 | 20.1 | 0.0 | 4.58                               | 0.59 | -     | -    | 363,232          | 285,529         | 2.8                         | 3.2               | 655.3                             | 73.0  | 621.7 | 77.3  | 649.9 | 134.8 | 1041.5 | 1022.0 | 1304.2 |
| L2_2_C4*   | 0.0              | 0.1 | -    | -   | 4.32                               | 0.36 | -     | -    | 257,797          | 205,839         | 2.6                         | 2.8               | 734.0                             | 75.4  | 692.5 | 80.4  | 729.5 | 161.7 | 1020.4 | 994.2  | 1319.3 |
| S9_5_C1    | 0.3              | 0.3 | 25.2 | 0.0 | 5.32                               | 0.50 | 10.86 | 0.42 | 556,712          | 448,054         | 3.0                         | 4.4               | 7.1                               | 5.9   | 6.1   | 4.4   | 13.2  | 11.4  | 197.8  | 197.6  | 213.3  |
| S9_5_C2    | 0.3              | 0.3 | 25.2 | 0.0 | 5.33                               | 0.50 | 10.89 | 0.42 | 651,027          | 509,757         | 3.3                         | 4.4               | 192.9                             | 29.0  | 187.6 | 29.5  | 205.4 | 41.3  | 304.7  | 299.5  | 386.9  |
| S9_5_C3*   | 0.4              | 0.3 | -    | -   | 5.35                               | 0.49 | -     | -    | 389,966          | 337,716         | 2.6                         | 3.9               | 5.5                               | 2.6   | 4.9   | 1.5   | 9.1   | 5.2   | 55.1   | 41.3   | 73.9   |
| S9_5_C4    | 0.4              | 0.3 | -    | -   | 5.21                               | 0.48 | -     | -    | 424,380          | 285,990         | 2.7                         | 2.9               | 197.6                             | 32.8  | 192.8 | 33.0  | 220.8 | 45.1  | 307.6  | 302.6  | 365.0  |
| S9_5_C5    | 0.3              | 0.3 | 25.2 | 0.0 | 5.33                               | 0.50 | 10.88 | 0.42 | 672,317          | 417,451         | 3.5                         | 3.1               | 189.9                             | 28.9  | 184.7 | 29.3  | 202.0 | 41.2  | 298.7  | 294.9  | 384.2  |
| S9_5_C6    | 0.4              | 0.3 | -    | -   | 5.19                               | 0.47 | -     | -    | 424,718          | 285,863         | 2.7                         | 2.9               | 195.5                             | 32.4  | 190.9 | 32.7  | 218.6 | 44.7  | 304.2  | 299.2  | 361.2  |
| S9_6_C1    | 0.1              | 0.0 | 25.0 | 0.0 | 5.38                               | 0.33 | 13.68 | 0.38 | 526,570          | 376,915         | 5.4                         | 2.5               | 12.7                              | 3.8   | 12.7  | 3.6   | 20.9  | 9.4   | 130.7  | 124.6  | 219.5  |
| S9_6_C2    | 0.1              | 0.0 | 25.0 | 0.0 | 5.38                               | 0.33 | 13.66 | 0.38 | 545,400          | 433,796         | 5.1                         | 2.8               | 608.1                             | 88.5  | 617.7 | 88.0  | 654.5 | 138.5 | 1001.0 | 1030.4 | 1413.0 |
| S9_6_C3*   | 0.1              | 0.0 | -    | -   | 5.31                               | 0.32 | -     | -    | 389,966          | 337,716         | 2.6                         | 3.9               | 6.2                               | 1.9   | 6.2   | 2.0   | 12.2  | 6.3   | 66.6   | 66.4   | 121.2  |
| S9_6_C4*   | 0.1              | 0.0 | -    | -   | 5.00                               | 0.30 | -     | -    | 651,297          | 552,997         | 2.9                         | 2.5               | 212.8                             | 35.0  | 212.2 | 36.1  | 196.6 | 3.3   | 352.8  | 351.6  | 212.6  |
| S9_6_C5    | 0.1              | 0.0 | 25.0 | 0.0 | 5.38                               | 0.33 | 13.68 | 0.38 | 529,677          | 399,029         | 5.3                         | 2.3               | 594.8                             | 89.3  | 604.5 | 88.9  | 639.7 | 137.5 | 972.8  | 1001.5 | 1255.4 |
| S9_6_C6*   | 0.1              | 0.0 | -    | -   | 5.22                               | 0.31 | -     | -    | 640,735          | 529,694         | 3.7                         | 2.6               | 232.5                             | 39.4  | 232.7 | 40.4  | 214.6 | 3.7   | 398.9  | 384.5  | 241.5  |

‡ additional oblique cameras with angles of 50° to 65° included

\* pre-calibrated camera lens model used

**Table S3:** SfM model characteristics and model precision. Std = standard deviation, pix = pixel, M.K.P. = mean key point, Avg. = average.

| Model name | Orthoimage mosaics (OM) |                  |          |          |                                            |          |          | Single images (SI) |                  |          |          |                                            |          |          |
|------------|-------------------------|------------------|----------|----------|--------------------------------------------|----------|----------|--------------------|------------------|----------|----------|--------------------------------------------|----------|----------|
|            | n                       | rel. uncertainty |          |          | rel. difference between MC and measurement |          |          | n                  | rel. uncertainty |          |          | rel. difference between MC and measurement |          |          |
|            |                         | median (%)       | min. (%) | max. (%) | median (%)                                 | min. (%) | max. (%) |                    | median (%)       | min. (%) | max. (%) | median (%)                                 | min. (%) | max. (%) |
| K1_1_C1 A  | 353                     | 11.7             | 3.9      | 69.2     | 4.6                                        | 0        | 7.2      | 1018               | 8.2              | 2.5      | 30.1     | 2                                          | 0        | 5.5      |
| K1_1_C1 B  | 516                     | 10.3             | 3.3      | 50.1     | 4.1                                        | 0        | 7.1      | 978                | 8.4              | 2.4      | 31.7     | 2.6                                        | 0        | 6.1      |
| K1_1_C2 A  | 631                     | 9.9              | 3.2      | 40.4     | 3.9                                        | 0        | 6.9      | 999                | 8.1              | 2.4      | 28.5     | 2.9                                        | 0        | 4.8      |
| K1_1_C2 B  | 402                     | 11.6             | 3.8      | 68       | 4.2                                        | 0        | 8.1      | 944                | 9.4              | 2.5      | 29.7     | 2.3                                        | 0        | 5.1      |
| K1_1_C3 A  | 435                     | 14.6             | 4        | 66       | 2.5                                        | 0.1      | 8.3      | 902                | 9                | 3.6      | 29.3     | 2.5                                        | 0.1      | 6.8      |
| K1_1_C3 B  | 423                     | 14.9             | 4        | 48.5     | 2.8                                        | 0        | 7.9      | 961                | 8.8              | 3.6      | 33.3     | 2.4                                        | 0.1      | 6.4      |
| K1_1_C4 A  | 354                     | 15               | 4.2      | 62.5     | 3.5                                        | 0.1      | 8.8      | 908                | 9.4              | 3.9      | 29.8     | 2.8                                        | 0.1      | 7.3      |
| K1_1_C4 B  | 436                     | 13.7             | 3.7      | 56.4     | 4.1                                        | 0        | 8.8      | 996                | 9.2              | 3.7      | 28.4     | 2.6                                        | 0        | 7.5      |
| K1_2_C1 A  | 908                     | 8.3              | 2.5      | 31.8     | 5.2                                        | 0.1      | 8.5      | 1308               | 7.3              | 2.3      | 29.6     | 3.2                                        | 0.1      | 5.7      |
| K1_2_C1 B  | 937                     | 8                | 2.4      | 31.7     | 5.7                                        | 0        | 8.6      | 1584               | 6.5              | 2.1      | 30.6     | 3.3                                        | 0.3      | 5.5      |
| K1_2_C2 A  | 966                     | 7.8              | 2.4      | 33.7     | 5.1                                        | 0        | 8.4      | 1232               | 8.1              | 2.4      | 27.4     | 3.2                                        | 0.1      | 7.6      |
| K1_2_C2 B  | 1001                    | 7.7              | 2.5      | 34.6     | 5.6                                        | 0.3      | 7.6      | 1600               | 6.5              | 2        | 26.6     | 3.5                                        | 0.7      | 6.3      |
| K1_2_C3 A  | 981                     | 9.1              | 2.5      | 35.9     | 4.1                                        | 0.1      | 7.3      | 1280               | 7.6              | 3.6      | 25.9     | 3                                          | 0.1      | 10.9     |
| K1_2_C3 B  | 974                     | 8.8              | 2.5      | 30.4     | 4.7                                        | 0        | 7.6      | 1512               | 7.1              | 3.4      | 22.9     | 3.4                                        | 0.1      | 11.3     |
| K1_2_C4 A  | 1142                    | 8.3              | 2.4      | 22.2     | 4.8                                        | 0.2      | 7.8      | 1214               | 8                | 4        | 26.9     | 2.3                                        | 0        | 16.2     |
| K1_2_C4 B  | 997                     | 9.1              | 2.5      | 21.6     | 4.5                                        | 0.1      | 8.2      | 1496               | 6.8              | 3.7      | 29.2     | 2.5                                        | 0        | 16.9     |
| L2_1_C1 A  | 136                     | 37.2             | 7.7      | 189.3    | 2.5                                        | 0        | 11.1     | 160                | 30.2             | 7.8      | 71.8     | 1                                          | 0        | 5.7      |
| L2_1_C1 B  | 354                     | 19.3             | 3.8      | 48.8     | 2.8                                        | 0        | 9.2      | 384                | 16.7             | 3.9      | 72       | 1.6                                        | 0        | 7.4      |
| L2_1_C2 A  | 226                     | 29.6             | 6.3      | 157.6    | 2.4                                        | 0        | 10.4     | 147                | 30.7             | 9.7      | 52.6     | 0.9                                        | 0        | 4.3      |
| L2_1_C2 B  | 347                     | 17.7             | 3.9      | 42.2     | 4.1                                        | 0.3      | 9.8      | 381                | 16               | 4.1      | 81       | 1.7                                        | 0        | 8.1      |
| L2_1_C3 A  | 247                     | 26.6             | 5.1      | 63.6     | 1.8                                        | 0        | 16       | 153                | 33.1             | 26.1     | 125.1    | 3.6                                        | 0        | 46.2     |
| L2_1_C3 B  | 264                     | 23.3             | 4        | 78.8     | 2.8                                        | 0.1      | 9.4      | 387                | 19.6             | 11.7     | 79.5     | 2.4                                        | 0        | 46.7     |
| L2_1_C4 A  | 223                     | 26               | 6.2      | 45.3     | 2.5                                        | 0.1      | 6.8      | 130                | 41.5             | 19.8     | 123.5    | 2.8                                        | 0        | 25.3     |
| L2_1_C4 B  | 216                     | 27.3             | 5.7      | 48.3     | 3                                          | 0.2      | 8.8      | 374                | 17.5             | 9.7      | 47.4     | 2.2                                        | 0        | 25.8     |
| L2_2_C1 A  | 399                     | 22.5             | 5.3      | 79.4     | 1.6                                        | 0        | 9        | 315                | 25.4             | 6        | 49.3     | 0.9                                        | 0        | 5.5      |
| L2_2_C1 B  | 551                     | 15.6             | 3.2      | 31.9     | 3.3                                        | 0.1      | 9.2      | 611                | 15.8             | 3.2      | 36.7     | 1.3                                        | 0        | 7.1      |
| L2_2_C2 A* | 379                     | 21.5             | 5.4      | 89.4     | 1.4                                        | 0        | 11.2     | 288                | 26.8             | 6.5      | 77       | 0.9                                        | 0        | 5.8      |
| L2_2_C2 B* | 510                     | 16.3             | 3.2      | 47.4     | 3.9                                        | 0        | 9        | 633                | 15.6             | 3.4      | 30.5     | 1.6                                        | 0.1      | 7.4      |
| L2_2_C3 A  | 542                     | 18.8             | 3.6      | 27.4     | 2.3                                        | 0        | 9.7      | 295                | 28.7             | 15.2     | 57.2     | 2.1                                        | 0        | 32.2     |
| L2_2_C3 B  | 524                     | 18               | 3.6      | 45.9     | 1.9                                        | 0        | 9.1      | 599                | 16.8             | 8.1      | 40.2     | 1.9                                        | 0        | 31       |
| L2_2_C4 A* | 570                     | 17.3             | 3.6      | 23.3     | 3                                          | 0.1      | 19.6     | 279                | 29.3             | 16.5     | 71.3     | 3.3                                        | 0        | 36.2     |
| L2_2_C4 B* | 559                     | 17.8             | 3.3      | 38       | 3.9                                        | 0.1      | 12.5     | 612                | 16.1             | 8.6      | 48.8     | 3.3                                        | 0.1      | 34.5     |
| S9_5_C1 A  | 256                     | 16.9             | 4.9      | 48.9     | 2.6                                        | 0        | 10       | 537                | 11.7             | 3.7      | 41.1     | 1.7                                        | 0.1      | 7        |
| S9_5_C1 B  | 191                     | 25.6             | 6.5      | 91.3     | 2.6                                        | 0        | 11.8     | 335                | 20.5             | 5.9      | 40.1     | 0.9                                        | 0        | 4.6      |
| S9_5_C3 A* | 508                     | 12.2             | 4.1      | 81.1     | 4.4                                        | 0.1      | 9.1      | 547                | 11.3             | 4.1      | 59.4     | 3.2                                        | 0.1      | 8.1      |
| S9_5_C3 B* | 209                     | 22.9             | 7        | 40.2     | 3.5                                        | 0.1      | 9.6      | 339                | 21               | 5.9      | 60.9     | 3                                          | 0.3      | 6.5      |
| S9_5_C5 A  | 194                     | 19.7             | 5.9      | 42.1     | 7.2                                        | 0.2      | 12.5     | 528                | 11.9             | 5.6      | 87.7     | 4.9                                        | 1        | 9.7      |
| S9_5_C5 B  | 133                     | 28.7             | 7.7      | 54.5     | 6                                          | 0.4      | 15.4     | 333                | 19.6             | 8        | 41       | 5                                          | 1.3      | 8.7      |
| S9_5_C6 A  | 213                     | 16.4             | 6        | 34.9     | 4.6                                        | 0.2      | 10.6     | 550                | 11.8             | 5.9      | 55       | 3.7                                        | 0        | 7.9      |
| S9_5_C6 B  | 160                     | 21.2             | 6.9      | 70.5     | 4.6                                        | 0.4      | 11       | 353                | 21.1             | 8.4      | 91.6     | 3.2                                        | 0.6      | 7.2      |
| S9_6_C1 A  | 1058                    | 8.2              | 2.4      | 32.3     | 3                                          | 0.1      | 9        | 1421               | 7.6              | 2.2      | 32.6     | 2                                          | 0        | 5.1      |
| S9_6_C1 B  | 451                     | 18.9             | 4.5      | 48.2     | 2.6                                        | 0.1      | 5.3      | 543                | 17.5             | 4.1      | 35.9     | 1.1                                        | 0        | 5.5      |
| S9_6_C3 A* | 1033                    | 8.6              | 2.6      | 30.5     | 3.6                                        | 0.1      | 8.5      | 1267               | 7.7              | 2.3      | 30.8     | 2.9                                        | 0.1      | 6.2      |
| S9_6_C3 B* | 418                     | 20.9             | 5.7      | 62.8     | 2.9                                        | 0        | 8.2      | 556                | 17.6             | 3.8      | 53.7     | 2.2                                        | 0.2      | 8.2      |
| S9_6_C5 A  | 615                     | 11.2             | 3.7      | 51.4     | 9.2                                        | 0.3      | 15.6     | 1451               | 7.9              | 4.8      | 35.1     | 8.9                                        | 0.7      | 28.4     |
| S9_6_C5 B  | 277                     | 18.4             | 5.1      | 41.3     | 9.1                                        | 0.9      | 17.5     | 570                | 17.7             | 8.3      | 35.1     | 8.1                                        | 0.4      | 22       |
| S9_6_C6 A* | 613                     | 11.1             | 3.6      | 55.6     | 3.9                                        | 0.5      | 7.9      | 1256               | 7.8              | 3.4      | 30.9     | 3                                          | 0        | 6.7      |
| S9_6_C6 B* | 297                     | 17.5             | 4.5      | 47.4     | 4.3                                        | 0        | 11.5     | 544                | 18.4             | 5.5      | 50.7     | 2.1                                        | 0        | 8.1      |

\* pre-calibrated camera lens model used

**Table S4:** Overall grain size percentile uncertainty (95% confidence interval) summary across all percentiles relative to photo-measured percentiles, and number of grains segmented.

| <i>D</i> | <i>Grain size region</i> | <i>Orthoimage mosaics (OM)</i> |                    |                   |                   |                         |                        |                             |                            |                             | <i>Single images (SI)</i> |                    |                   |                   |                         |                        |                             |                            |                             |
|----------|--------------------------|--------------------------------|--------------------|-------------------|-------------------|-------------------------|------------------------|-----------------------------|----------------------------|-----------------------------|---------------------------|--------------------|-------------------|-------------------|-------------------------|------------------------|-----------------------------|----------------------------|-----------------------------|
|          |                          | <i>median D (mm)</i>           | <i>mean D (mm)</i> | <i>min D (mm)</i> | <i>max D (mm)</i> | <i>mean 95% CI (mm)</i> | <i>95% CI Std (mm)</i> | <i>mean Difference (mm)</i> | <i>Difference Std (mm)</i> | <i>rel. Uncertainty (%)</i> | <i>median D (mm)</i>      | <i>mean D (mm)</i> | <i>min D (mm)</i> | <i>max D (mm)</i> | <i>mean 95% CI (mm)</i> | <i>95% CI Std (mm)</i> | <i>mean Difference (mm)</i> | <i>Difference Std (mm)</i> | <i>rel. Uncertainty (%)</i> |
| D50      | K1 A                     | 32.6                           | 31.5               | 30.9              | 35.6              | 3.5                     | 0.9                    | 1.6                         | 0.4                        | 10.7                        | 31.5                      | 30.8               | 30.6              | 32.9              | 2.5                     | 0.2                    | 0.8                         | 0.2                        | 7.9                         |
|          | K1 B                     | 32.3                           | 31.2               | 31.2              | 35.3              | 3.4                     | 0.9                    | 1.7                         | 0.4                        | 10.5                        | 31.7                      | 30.7               | 31                | 32.1              | 2.4                     | 0.4                    | 0.9                         | 0.1                        | 7.6                         |
| D84      | K1 A                     | 66.6                           | 66.4               | 57.6              | 78.6              | 14.6                    | 4.1                    | 1.2                         | 0.4                        | 21.9                        | 65.4                      | 65.7               | 63.9              | 69.7              | 10.7                    | 0.8                    | 0.6                         | 0.3                        | 16.4                        |
|          | K1 B                     | 67.5                           | 66.5               | 63.3              | 72.2              | 14.2                    | 3.4                    | 1                           | 0.4                        | 21.0                        | 69.5                      | 68.8               | 64.1              | 72.5              | 11.4                    | 2.6                    | 0.5                         | 0.3                        | 16.4                        |
| D96      | K1 A                     | 121.1                          | 122.6              | 109               | 148.2             | 37.9                    | 14.7                   | 1.3                         | 0.9                        | 31.3                        | 121.9                     | 121.4              | 117               | 128.6             | 27.5                    | 3.7                    | 1.2                         | 0.9                        | 22.6                        |
|          | K1 B                     | 121.9                          | 125.1              | 117.7             | 150.6             | 36.7                    | 13.1                   | 2                           | 1.9                        | 30.1                        | 136.8                     | 137.8              | 127.5             | 153.1             | 34.6                    | 9.3                    | 1.5                         | 0.6                        | 25.3                        |
| D50      | L2 A                     | 47                             | 47                 | 44.6              | 53.8              | 12.4                    | 3.2                    | 1                           | 0.5                        | 26.4                        | 48.3                      | 46.9               | 41.2              | 51.9              | 15.3                    | 1                      | 0.5                         | 0.5                        | 31.7                        |
|          | L2 B                     | 39                             | 38.5               | 35.6              | 44.4              | 7.7                     | 1.6                    | 1.5                         | 0.8                        | 19.7                        | 36.1                      | 36.5               | 33.8              | 39.6              | 6.1                     | 0.3                    | 0.3                         | 0.2                        | 16.9                        |
| D84      | L2 A                     | 115.1                          | 112.6              | 97.8              | 124.8             | 31.2                    | 8.9                    | 2.6                         | 1.8                        | 27.1                        | 118.7                     | 120                | 105.7             | 136.3             | 41                      | 5.9                    | 1.8                         | 1.3                        | 34.5                        |
|          | L2 B                     | 93                             | 93.5               | 85.5              | 110               | 25.9                    | 3.4                    | 1.5                         | 0.9                        | 27.8                        | 97.7                      | 94.7               | 74.5              | 110.4             | 30.3                    | 4.1                    | 0.8                         | 0.6                        | 31.0                        |
| D96      | L2 A                     | 178.7                          | 177.7              | 151.1             | 200.8             | 51.2                    | 14.1                   | 4.2                         | 4.8                        | 28.7                        | 202.1                     | 196.6              | 165.2             | 229.8             | 78.8                    | 16.1                   | 4.1                         | 4.6                        | 39.0                        |
|          | L2 B                     | 170.5                          | 163.8              | 149               | 182.9             | 52.8                    | 15                     | 6.3                         | 3.4                        | 31.0                        | 194.9                     | 184.1              | 153               | 200.8             | 60.5                    | 24.4                   | 3.3                         | 3.2                        | 31.0                        |
| D50      | S9 A                     | 33.7                           | 32.4               | 32.6              | 35.8              | 4.4                     | 1.2                    | 1.5                         | 0.8                        | 13.1                        | 33.9                      | 32.6               | 32.4              | 35.3              | 3.3                     | 0.7                    | 1.3                         | 0.7                        | 9.7                         |
|          | S9 B                     | 36.2                           | 35.2               | 33.1              | 41.9              | 8                       | 1.4                    | 1.8                         | 0.7                        | 22.1                        | 41.2                      | 40.1               | 40.4              | 43.1              | 8.2                     | 0.7                    | 1.3                         | 1                          | 19.9                        |
| D84      | S9 A                     | 63.8                           | 62.5               | 59.5              | 71.5              | 12.8                    | 4.7                    | 2.2                         | 1.8                        | 20.1                        | 66.6                      | 65.5               | 65.2              | 71.3              | 10.3                    | 2.6                    | 1.9                         | 1.5                        | 15.5                        |
|          | S9 B                     | 82.5                           | 83.4               | 66                | 105.5             | 26.8                    | 5.9                    | 1.9                         | 1.5                        | 32.5                        | 109.2                     | 107                | 102.9             | 117.7             | 26.4                    | 4.5                    | 2.7                         | 2.2                        | 24.2                        |
| D96      | S9 A                     | 102.6                          | 103.5              | 88.7              | 140.5             | 32.5                    | 12.9                   | 3.3                         | 3.1                        | 31.7                        | 113.8                     | 113.9              | 106.8             | 131.2             | 32.1                    | 6.6                    | 3                           | 3.4                        | 28.2                        |
|          | S9 B                     | 138                            | 143                | 110.6             | 179.3             | 51.7                    | 10                     | 3.8                         | 3                          | 37.5                        | 184.7                     | 182.8              | 170.3             | 202.6             | 52.3                    | 16.9                   | 2.7                         | 2.5                        | 28.3                        |

**Table S5:** Grain size results for the D<sub>50</sub>, D<sub>84</sub> and D<sub>96</sub> averaged across all surveys. Difference refers to the difference between measured and modelled percentile value. Std = standard deviation, CI = confidence interval.
